# Supplementary material
Source: MDPI journal article supplement (https://www.mdpi.com/2073-4344/12/5/569)
Supplement: s1 [file s1]

## Supporting Information:

### Mechanism insight into catalytic performance of $\text{Ni}_{12}\text{P}_5$ over $\text{Ni}_2\text{P}$ toward the catalytic deoxygenation of butyric acid

Shuai Fu<sup>a</sup>, Dan Li<sup>b</sup>, Ting-Hao Liu<sup>a</sup>, Li-Juan Liu<sup>a</sup>, Hua-Qing Yang<sup>a\*</sup>, Chang-Wei Hu<sup>b</sup>

<sup>a</sup> College of Chemical Engineering, Sichuan University, Chengdu, Sichuan, 610065, P.R. China

<sup>b</sup> Key Laboratory of Green Chemistry and Technology, Ministry of Education, College of Chemistry, Sichuan University, Chengdu, Sichuan, 610064, P.R. China

\*Correspondence to:

H.-Q. Yang; e-mail: huaqingyang@scu.edu.cn; Fax: 86 28 85464466; Telephone: 86 28 85464466

*Catalysts*

## content

|       |                                                                                                                                                                                                                                                                                                                                                                                                                                                                                                                                                |     |
|-------|------------------------------------------------------------------------------------------------------------------------------------------------------------------------------------------------------------------------------------------------------------------------------------------------------------------------------------------------------------------------------------------------------------------------------------------------------------------------------------------------------------------------------------------------|-----|
| i.    | <b>NOTES:</b> Evaluation of rate constants.....                                                                                                                                                                                                                                                                                                                                                                                                                                                                                                | S1  |
| ii.   | <b>Figure S1:</b> Arrhenius plots of rate constants for the crucial reaction step (F2-IM2 $\rightarrow$ F2-TS2) in the reaction stage $C_3H_7COOH \rightarrow C_3H_8 + CO_2$ (S2) catalyzed $Ni_{12}P_5$ cluster.....                                                                                                                                                                                                                                                                                                                          | S2  |
| iii.  | <b>Figure S2:</b> Arrhenius plots of rate constants for the crucial reaction step (F3-IM4 $\rightarrow$ F3-TS4 + $C_3H_7CHO$ ) in the reaction stage $C_3H_7COOH + H_2 \rightarrow C_3H_7CHO + H_2O$ (S3) catalyzed by $Ni_{12}P_5$ cluster.....                                                                                                                                                                                                                                                                                               | S3  |
| iv.   | <b>Figure S3:</b> Arrhenius plots of rate constants for the crucial reaction step (F4-IM3 $\rightarrow$ F4-TS3 + CO) in the reaction stage $C_3H_7CHO \rightarrow C_3H_8 + CO$ (S4) catalyzed by $Ni_{12}P_5$ cluster.....                                                                                                                                                                                                                                                                                                                     | S4  |
| v.    | <b>Figure S4:</b> Arrhenius plots of rate constants for the crucial reaction step (F4-IM3 $\rightarrow$ F4-TS3 + CO) in the reaction stage $C_3H_7COOH \rightarrow C_2H_5CH_2OH + CO$ (S5) catalyzed by $Ni_{12}P_5$ cluster.....                                                                                                                                                                                                                                                                                                              | S5  |
| vi.   | <b>Figure S5:</b> Arrhenius plots of rate constants for the crucial reaction step (F5-IM4 $\rightarrow$ F7-TS2 + CO) in the reaction stage $C_3H_7COOH \rightarrow CH_3CH=CH_2 + H_2O + CO$ (S5/7a) catalyzed by $Ni_{12}P_5$ cluster.....                                                                                                                                                                                                                                                                                                     | S6  |
| vii.  | <b>Figure S6:</b> Arrhenius plots of rate constants for the crucial reaction step (F8-IM3 $\rightarrow$ F8-TS3) in the reaction stage $C_3H_7CHO + H_2 \rightarrow C_3H_7CH_2OH$ catalyzed by $Ni_{12}P_5$ cluster.....                                                                                                                                                                                                                                                                                                                        | S7  |
| viii. | <b>Figure S7:</b> Arrhenius plots of rate constants for the crucial reaction step (F9-IM3 + $H_2O \rightarrow$ F9-TS2) in the reaction stage $C_3H_7CH_2OH + H_2 \rightarrow C_4H_{10} + H_2O$ catalyzed by $Ni_{12}P_5$ cluster.....                                                                                                                                                                                                                                                                                                          | S8  |
| ix.   | <b>Figure S8:</b> Arrhenius plots of rate constants for the crucial reaction step (F10-IM5 + $H_2O \rightarrow$ F10-TS1) in the reaction stage $C_3H_7CH_2OH + H_2 \rightarrow C_4H_{10} + H_2O$ (S10a + S10b) catalyzed by $Ni_{12}P_5$ cluster.....                                                                                                                                                                                                                                                                                          | S9  |
| x.    | <b>Figure S9:</b> Arrhenius plots of rate constants for the crucial reaction step (F3-IM4 + $H_2 \rightarrow$ F8-TS3 + $H_2O$ ) in the reaction stage $C_3H_7COOH + 3H_2 \rightarrow C_4H_{10} + 2H_2O$ (S3 + S8 + S9) catalyzed by $Ni_{12}P_5$ cluster.....                                                                                                                                                                                                                                                                                  | S10 |
| xi.   | <b>Table S1:</b> Sum of electronic energies ( $E_t$ , hartree), free energies ( $G_0$ , hartree), sum of electronic and free energies ( $G_c$ , hartree), relative energies ( $G_r$ , kJ mol <sup>-1</sup> ) and relative energies ( $G_r(CO_2\uparrow)$ , kJ mol <sup>-1</sup> , under the experimental condition of 10 <sup>-5</sup> atm pressure of $CO_2$ ) of various species with respect to the reactants for the reaction of $C_3H_7COOH \rightarrow C_3H_8 + CO_2$ catalyzed by $Ni_{12}P_5$ cluster at GGA-PBE/DNP, DSPP level.....  | S11 |
| xii.  | <b>Table S2:</b> Sum of electronic energies ( $E_t$ , hartree), free energies ( $G_0$ , hartree), sum of electronic and free energies ( $G_c$ , hartree) and relative energies ( $G_r$ , kJ mol <sup>-1</sup> ) of various species with respect to the reactants for the reaction of $C_3H_7COOH + H_2 \rightarrow C_3H_7CHO + H_2O$ catalyzed by $Ni_{12}P_5$ at GGA-PBE/DNP, DSPP level.....                                                                                                                                                 | S12 |
| xiii. | <b>Table S3:</b> Sum of electronic energies ( $E_t$ , hartree), free energies ( $G_0$ , hartree), sum of electronic and free energies ( $G_c$ , hartree), relative energies ( $G_r$ , kJ mol <sup>-1</sup> ) and relative energies ( $G_r(CO\uparrow)$ , kJ mol <sup>-1</sup> , under the experimental condition of 10 <sup>-5</sup> atm pressure of CO) of various species with respect to the reactants for the reaction of $C_3H_7CHO \rightarrow C_3H_8 + CO$ catalyzed by $Ni_{12}P_5$ cluster at GGA-PBE/DNP, DSPP level.....            | S13 |
| xiv.  | <b>Table S4:</b> Sum of electronic energies ( $E_t$ , hartree), free energies ( $G_0$ , hartree), sum of electronic and free energies ( $G_c$ , hartree), relative energies ( $G_r$ , kJ mol <sup>-1</sup> ) and relative energies ( $G_r(CO\uparrow)$ , kJ mol <sup>-1</sup> , under the experimental condition of 10 <sup>-5</sup> atm pressure of CO) of various species with respect to the reactants for the reaction of $C_3H_7COOH \rightarrow C_2H_5CH_2OH + CO$ catalyzed by $Ni_{12}P_5$ cluster at GGA-PBE/DNP, DSPP level.....     | S14 |
| xv.   | <b>Table S5:</b> Sum of electronic energies ( $E_t$ , hartree), free energies ( $G_0$ , hartree), sum of electronic and free energies ( $G_c$ , hartree), relative energies ( $G_r$ , kJ mol <sup>-1</sup> ) and relative energies ( $G_r(CO\uparrow)$ , kJ mol <sup>-1</sup> , under the experimental condition of 10 <sup>-5</sup> atm pressure of CO) of various species with respect to the reactants for the reaction of $C_2H_5CH_2OH + H_2 \rightarrow C_3H_8 + H_2O$ catalyzed by $Ni_{12}P_5$ cluster at GGA-PBE/DNP, DSPP level..... | S15 |
| xvi.  | <b>Table S6:</b> Sum of electronic energies ( $E_t$ , hartree), free energies ( $G_0$ , hartree), sum of electronic and free energies ( $G_c$ , hartree), relative energies ( $G_r$ , kJ mol <sup>-1</sup> ) and relative energies ( $G_r(CO\uparrow)$ , kJ mol <sup>-1</sup> , under the experimental condition of 10 <sup>-5</sup> atm pressure of CO) of various species with respect to the reactants for the reaction of $C_2H_5CH_2OH \rightarrow CH_3CH=CH_2 + H_2O$ catalyzed by $Ni_{12}P_5$ cluster at GGA-PBE/DNP, DSPP level.....  | S16 |

---

|        |                                                                                                                                                                                                                                                                                                                                                                                                                                                                                                                                                                                                        |     |
|--------|--------------------------------------------------------------------------------------------------------------------------------------------------------------------------------------------------------------------------------------------------------------------------------------------------------------------------------------------------------------------------------------------------------------------------------------------------------------------------------------------------------------------------------------------------------------------------------------------------------|-----|
| xvii.  | <b>Table S7:</b> Sum of electronic energies ( $E_t$ , hartree), free energies ( $G_0$ , hartree), sum of electronic and free energies ( $G_c$ , hartree), relative energies ( $G_r$ , kJ mol <sup>-1</sup> ) and relative energies ( $G_r(\text{CO}\uparrow)$ , kJ mol <sup>-1</sup> , under the experimental condition of 10 <sup>-5</sup> atm pressure of CO) of various species with respect to the reactants for the reaction of $\text{CH}_3\text{CH}=\text{CH}_2 + \text{H}_2 \rightarrow \text{C}_3\text{H}_8$ catalyzed by $\text{Ni}_{12}\text{P}_5$ cluster at GGA-PBE/DNP, DSPP level. .... | S17 |
| xviii. | <b>Table S8:</b> Sum of electronic energies ( $E_t$ , hartree), free energies ( $G_0$ , hartree), sum of electronic and free energies ( $G_c$ , hartree) and relative energies ( $G_r$ , kJ mol <sup>-1</sup> ) of various species with respect to the reactants for the reaction of $\text{C}_3\text{H}_7\text{CHO} + \text{H}_2 \rightarrow \text{C}_3\text{H}_7\text{CH}_2\text{OH}$ catalyzed by $\text{Ni}_{12}\text{P}_5$ cluster at GGA-PBE/DNP, DSPP level. ....                                                                                                                               | S18 |
| xix.   | <b>Table S9:</b> Sum of electronic energies ( $E_t$ , hartree), free energies ( $G_0$ , hartree), sum of electronic and free energies ( $G_c$ , hartree) and relative energies ( $G_r$ , kJ mol <sup>-1</sup> ) of various species with respect to the reactants for the reaction of $\text{C}_3\text{H}_7\text{CH}_2\text{OH} + \text{H}_2 \rightarrow \text{C}_4\text{H}_{10} + \text{H}_2\text{O}$ catalyzed by $\text{Ni}_{12}\text{P}_5$ cluster at GGA-PBE/DNP, DSPP level...                                                                                                                    | S19 |
| xx.    | <b>Table S10:</b> Sum of electronic energies ( $E_t$ , hartree), free energies ( $G_0$ , hartree), sum of electronic and free energies ( $G_c$ , hartree) and relative energies ( $G_r$ , kJ mol <sup>-1</sup> ) of various species with respect to the reactants for the reaction of $\text{C}_3\text{H}_7\text{CH}_2\text{OH} \rightarrow \text{CH}_3\text{CH}_2\text{CH}=\text{CH}_2 + \text{H}_2\text{O}$ catalyzed over $\text{Ni}_{12}\text{P}_5$ cluster at GGA-PBE/DNP, DSPP level. ....                                                                                                       | S20 |
| xxi.   | <b>Table S11:</b> Sum of electronic energies ( $E_t$ , hartree), free energies ( $G_0$ , hartree), sum of electronic and free energies ( $G_c$ , hartree) and relative energies ( $G_r$ , kJ mol <sup>-1</sup> ) of various species with respect to the reactants for the reaction of $\text{CH}_3\text{CH}_2\text{CH}=\text{CH}_2 + \text{H}_2 \rightarrow \text{C}_4\text{H}_{10}$ catalyzed by $\text{Ni}_{12}\text{P}_5$ cluster at GGA-PBE/DNP, DSPP level. ....                                                                                                                                  | S21 |

---

**NOTES: Evaluation of rate constants:**

The energetic span was employed to acquire the determining intermediate (DI) and determining transition state (DTS) through the whole catalytic cycle [1-6]. Based on transition state theory (TST), the  $k'$  can be evaluated by equations (i) and (ii). Together with tunnelling correction  $\kappa$  (iii) [7], the rate constants  $k$  can be evaluated by equation (iv).

$$k' = \frac{k_B T}{h c^0} \times e^{\frac{-\Delta G^\ddagger}{RT}} \quad (\text{i})$$

$$-\Delta G^\ddagger = \begin{cases} G_{\text{DTS}} - G_{\text{DI}} & \text{if DTS appears after DI} \\ G_{\text{DTS}} - G_{\text{DI}} + \Delta G_r & \text{if DTS appears before DI} \end{cases} \quad (\text{ii})$$

$$\kappa = 1 + \frac{1}{24} \left| \frac{\omega^\ddagger h}{k_B T} \right|^2 \quad (\text{iii})$$

$$k = \kappa \times k' \quad (\text{iv})$$

where  $k_B$  is the Boltzmann constant,  $T$  is the absolute temperature, and  $h$  is the Planck constant.  $G_{\text{DTS}}$  and  $G_{\text{DI}}$  are the Gibbs free energies of the TOF determining transition state (DTS) and the TOF determining intermediate (DI), and  $\Delta G_r$  is the global free energy of the whole cycle.  $c^0$  is the standard concentration ( $1 \text{ mol dm}^{-3}$ ),  $\Delta G^\ddagger$  is the activation Gibbs free energy barrier and  $\omega^\ddagger$  is the imaginary frequency of the DTS.

**Refs:**

1. Amatore, C.; Jutand, A. *J. Organomet. Chem.*, **1999**, 576, 254-278.
2. Kozuch, S.; Shaik, S. *J. Am. Chem. Soc.*, **2006**, 128, 3355–3365.
3. Kozuch, S.; Shaik, S. *J. Phys. Chem. A*, **2008**, 112, 6032–6041.
4. Uhe, A.; Kozuch, S.; Shaik, S. *J. Comput. Chem.*, **2011**, 32, 978-985.
5. Kozuch, S.; Shaik, S. *Acc. Chem. Res.*, **2011**, 44, 101-110.
6. Kozuch, S. *ACS Catal.*, **2015**, 5, 5242-5255.
7. Wigner, E. J. *Chem. Phys.* **1937**, 5, 720-725.

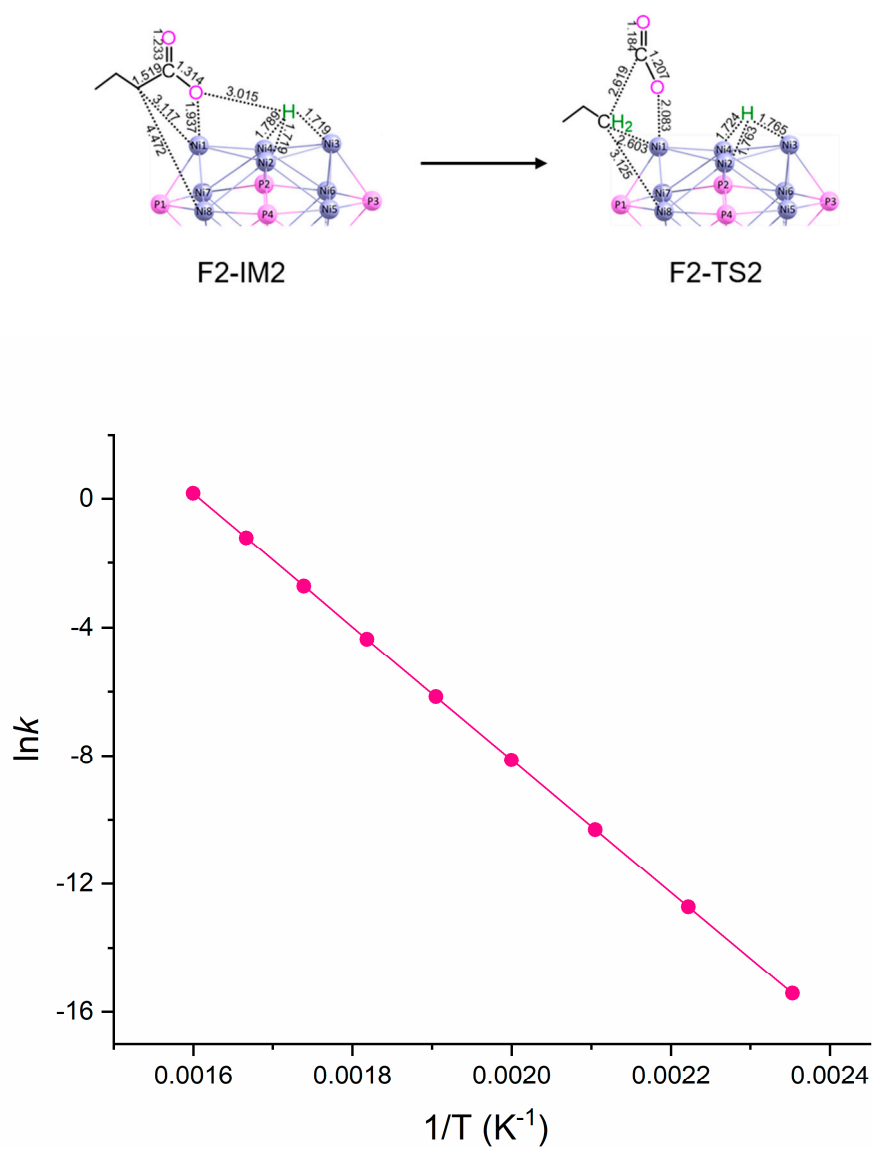

$$k_{S2} = 2.88 \times 10^{14} \exp(-172166 / RT)$$

**Figure S1:** Arrhenius plots of rate constants for the crucial reaction step (F2-IM2 → F2-TS2) in the reaction stage C<sub>3</sub>H<sub>7</sub>COOH → C<sub>3</sub>H<sub>8</sub> + CO<sub>2</sub> (S2) catalyzed Ni<sub>12</sub>P<sub>5</sub> cluster.

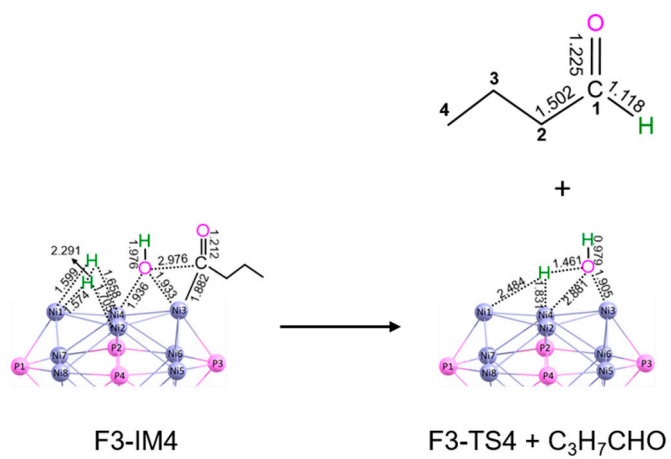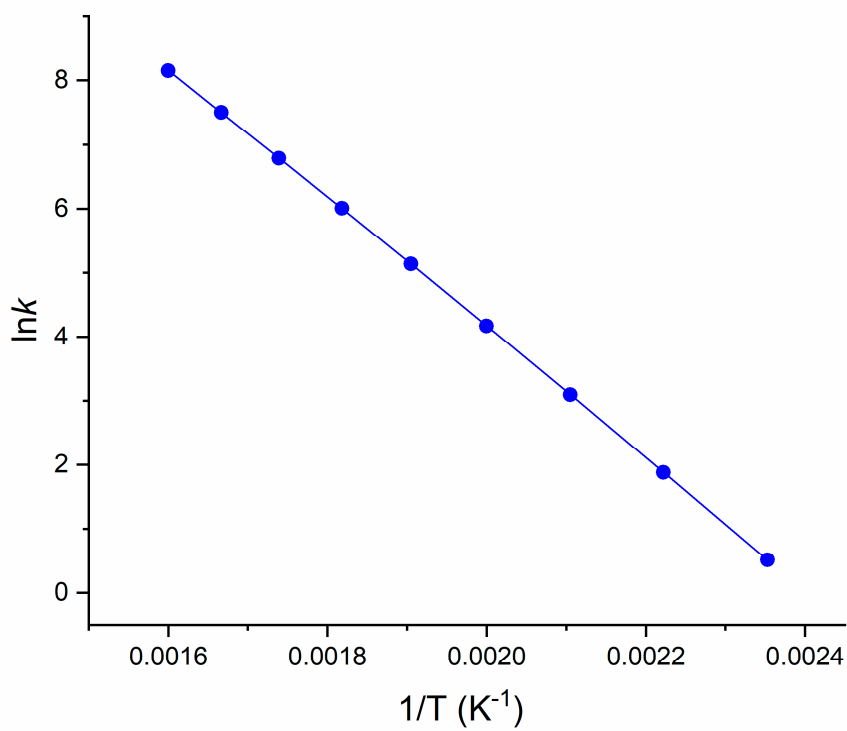

$$k_{S3} = 1.79 \times 10^{20} \exp(-174054 / RT)$$

**Figure S2:** Arrhenius plots of rate constants for the crucial reaction step (F3-IM4  $\rightarrow$  F3-TS4 + C<sub>3</sub>H<sub>7</sub>CHO) in the reaction stage C<sub>3</sub>H<sub>7</sub>COOH + H<sub>2</sub>  $\rightarrow$  C<sub>3</sub>H<sub>7</sub>CHO + H<sub>2</sub>O (S3) catalyzed by Ni<sub>12</sub>P<sub>5</sub> cluster.

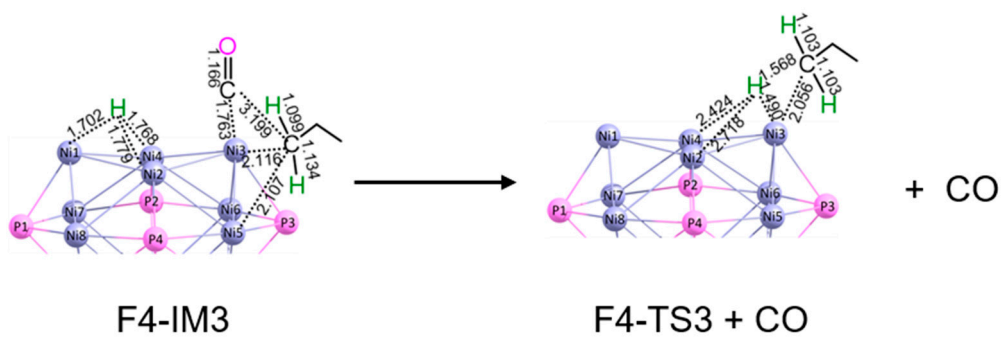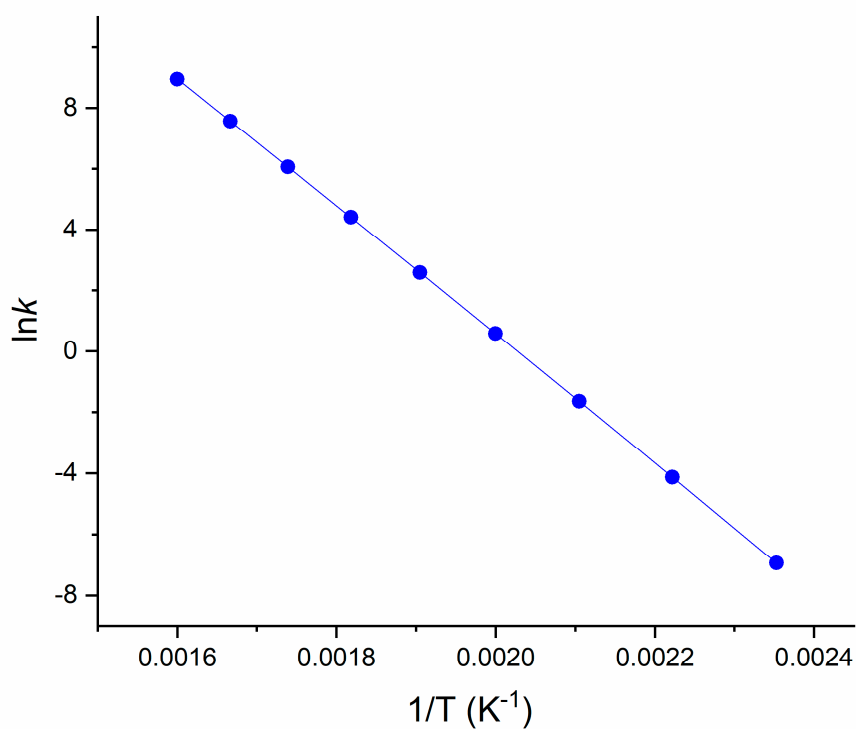

$$k_{S4} = 3.65 \times 10^{18} \exp(-175375 / RT)$$

**Figure S3:** Arrhenius plots of rate constants for the crucial reaction step (F4-IM3 → F4-TS3 + CO) in the reaction stage  $C_3H_7CHO \rightarrow C_3H_8 + CO$  (S4) catalyzed by  $Ni_{12}P_5$  cluster.

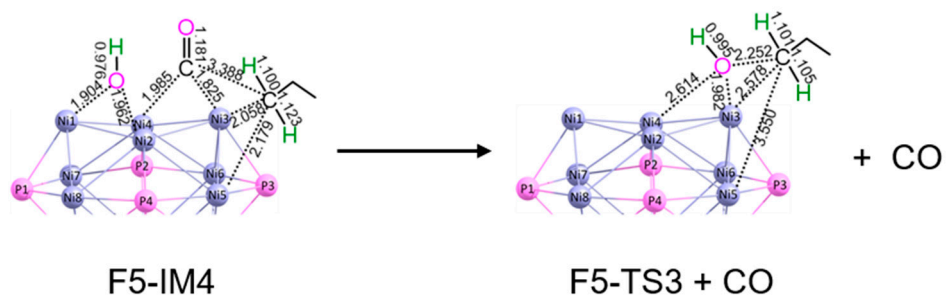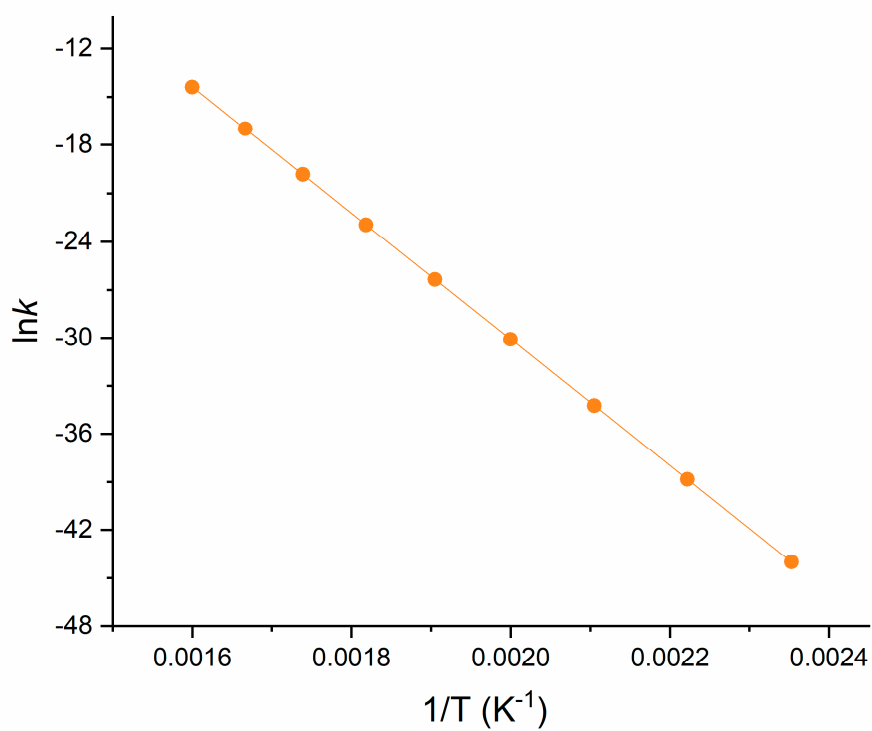

$$k_{S5} = 1.23 \times 10^{21} \exp(-327015 / RT)$$

**Figure S4:** Arrhenius plots of rate constants for the crucial reaction step ( $\text{F5-IM4} \rightarrow \text{F5-TS3} + \text{CO}$ ) in the reaction stage  $\text{C}_3\text{H}_7\text{COOH} \rightarrow \text{C}_2\text{H}_5\text{CH}_2\text{OH} + \text{CO}$  (S5) catalyzed by  $\text{Ni}_{12}\text{P}_5$  cluster.

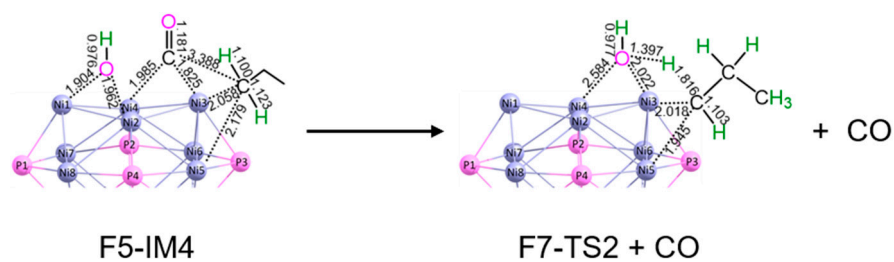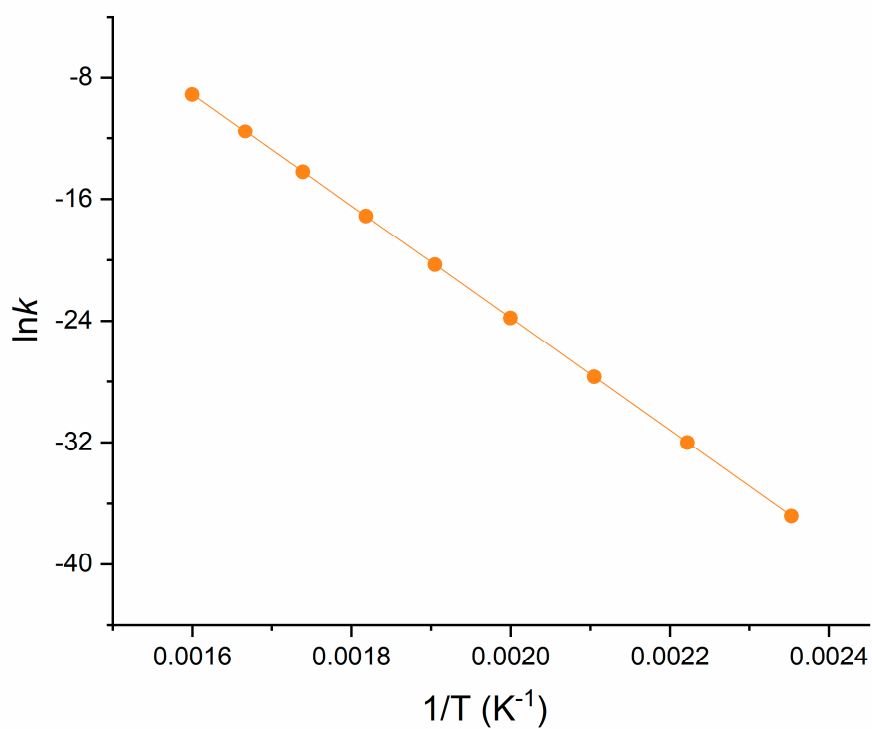

$$k_{S(5/7a)} = 4.45 \times 10^{21} \exp(-306230 / RT)$$

**Figure S5:** Arrhenius plots of rate constants for the crucial reaction step (F5-IM4 → F7-TS2 + CO) in the reaction stage  $\text{C}_3\text{H}_7\text{COOH} \rightarrow \text{CH}_3\text{CH}=\text{CH}_2 + \text{H}_2\text{O} + \text{CO}$  (S5/7a) catalyzed by  $\text{Ni}_{12}\text{P}_5$  cluster.

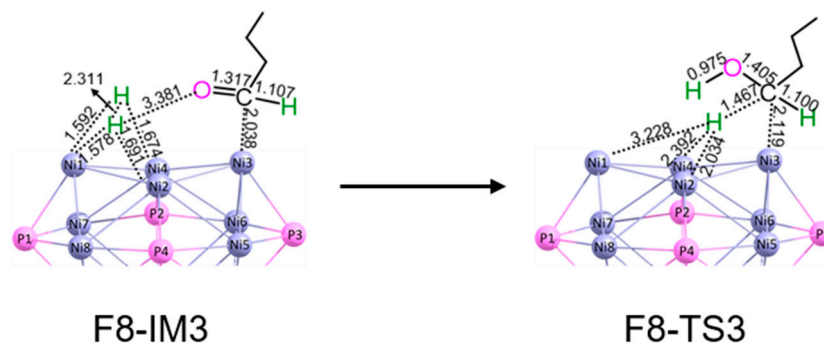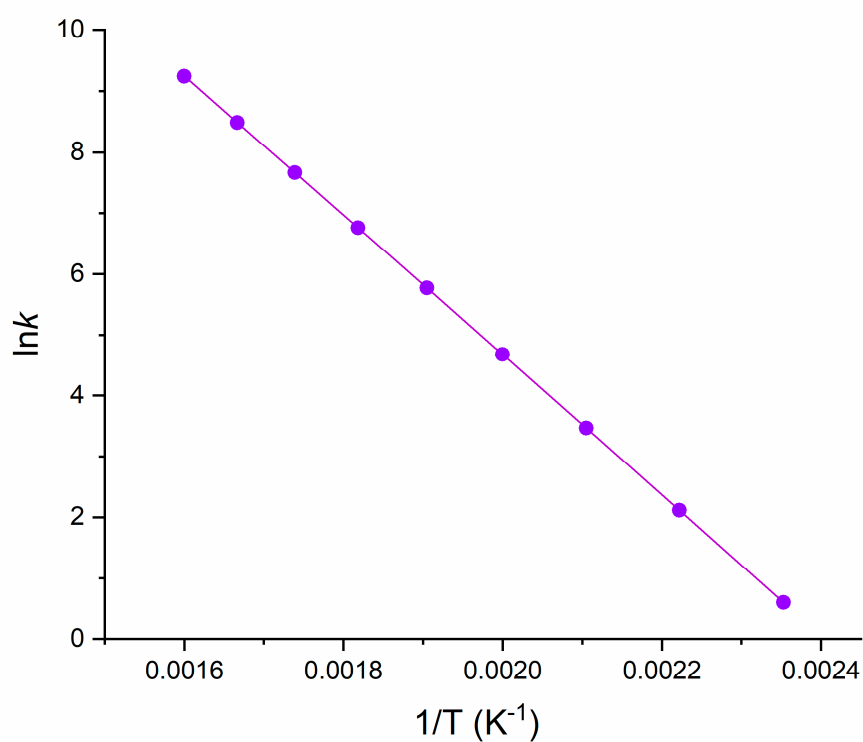

$$k_{s8} = 1.00 \times 10^{12} \exp(-95469 / RT)$$

**Figure S6:** Arrhenius plots of rate constants for the crucial reaction step (F8-IM3 → F8-TS3) in the reaction stage  $\text{C}_3\text{H}_7\text{CHO} + \text{H}_2 \rightarrow \text{C}_3\text{H}_7\text{CH}_2\text{OH}$  catalyzed by  $\text{Ni}_{12}\text{P}_5$  cluster.

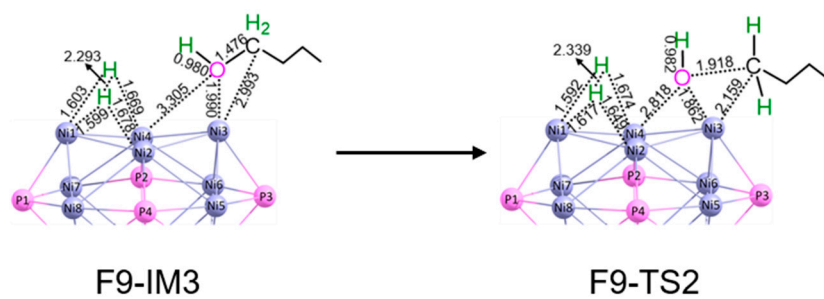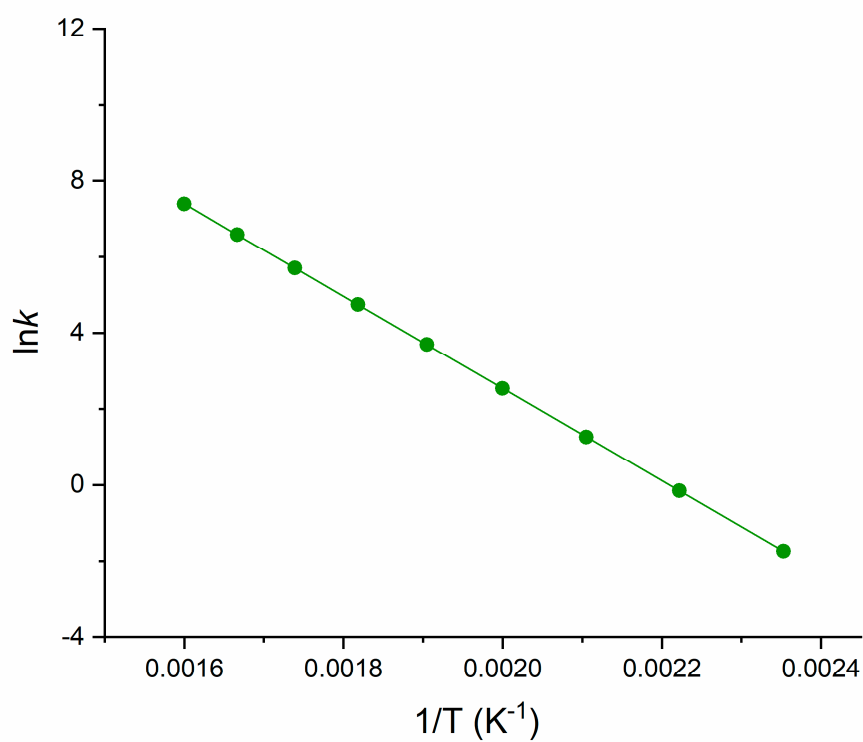

$$k_{S9} = 4.32 \times 10^{11} \exp(-100816 / RT)$$

**Figure S7:** Arrhenius plots of rate constants for the crucial reaction step (F9-IM3 → F9-TS2) in the reaction stage  $C_3H_7CH_2OH + H_2 \rightarrow C_4H_{10} + H_2O$  catalyzed by  $Ni_{12}P_5$  cluster.

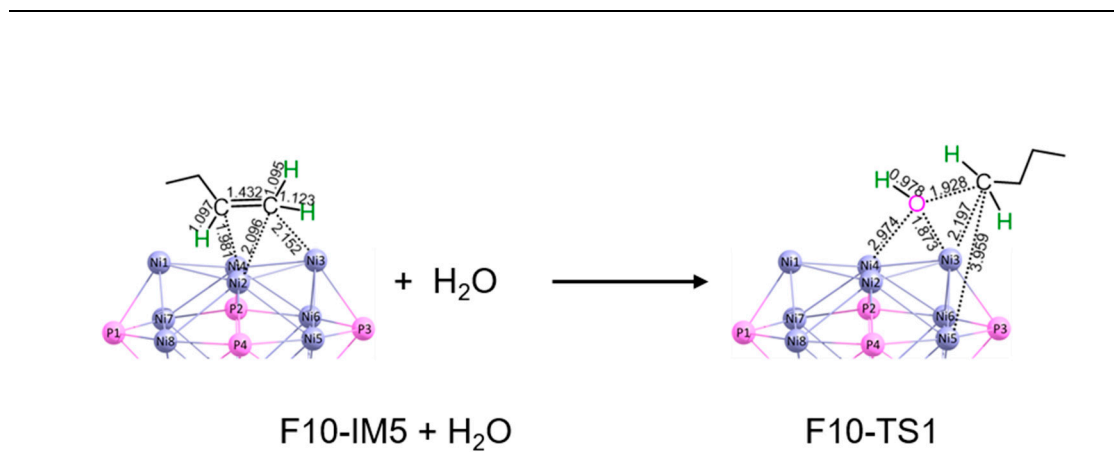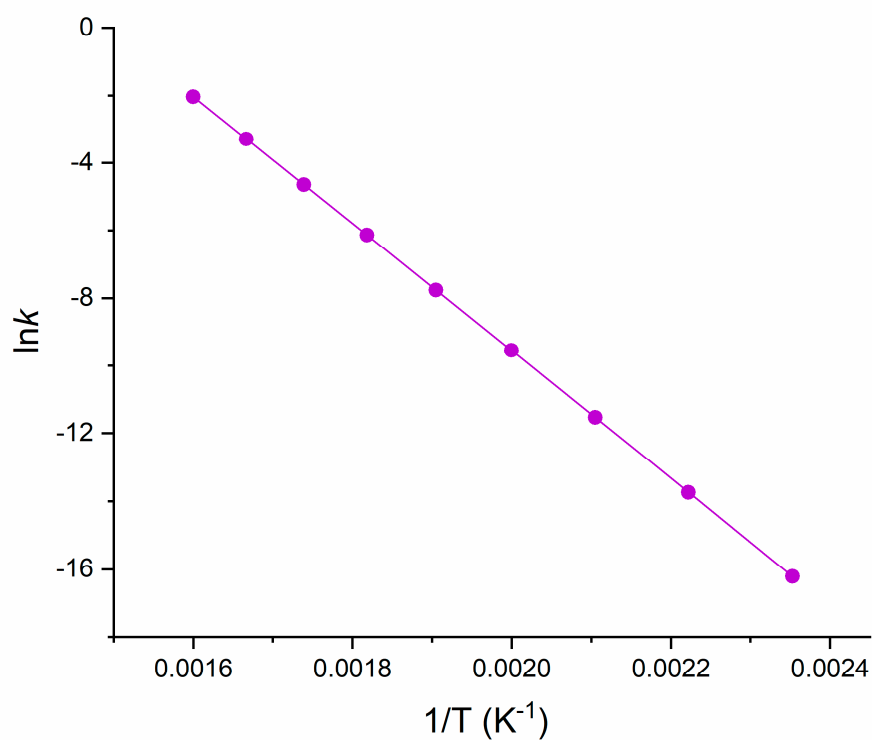

$$k_{S10} = 1.55 \times 10^{12} \exp(-156411 / RT)$$

**Figure S8:** Arrhenius plots of rate constants for the crucial reaction step (F10-IM5 + H<sub>2</sub>O  $\rightarrow$  F10-TS1) in the reaction stage C<sub>3</sub>H<sub>7</sub>CH<sub>2</sub>OH + H<sub>2</sub>  $\rightarrow$  C<sub>4</sub>H<sub>10</sub> + H<sub>2</sub>O (S10a + S10b) catalyzed by Ni<sub>12</sub>P<sub>5</sub> cluster.

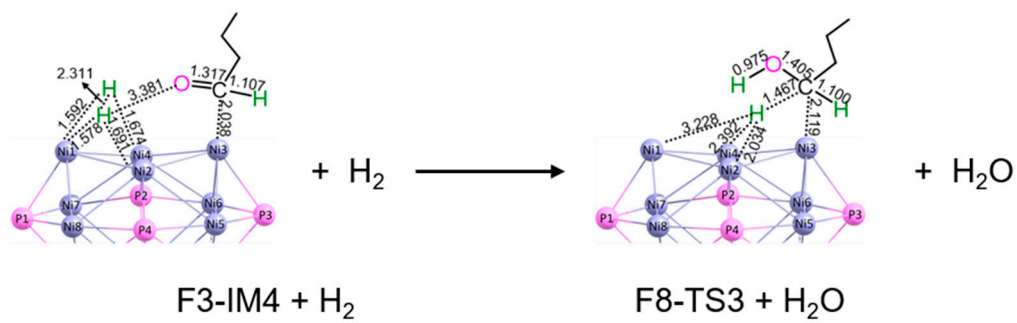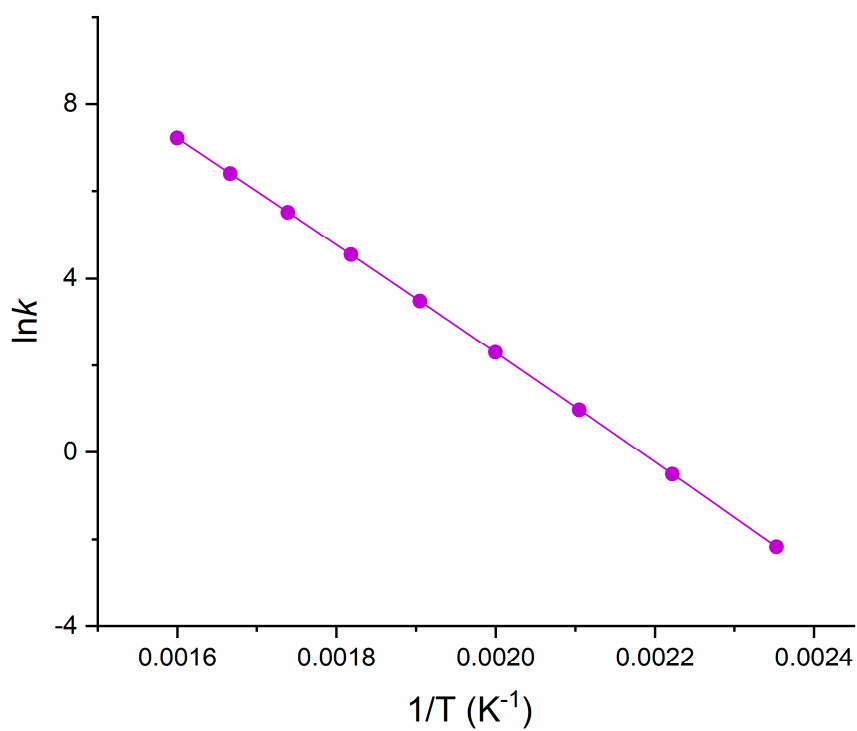

$$k_{C_4H_{10}} = 6.26 \times 10^{11} \exp(-103468 / RT)$$

**Figure S9:** Arrhenius plots of rate constants for the crucial reaction step (F3-IM4 + H<sub>2</sub> → F8-TS3 + H<sub>2</sub>O) in the reaction stage C<sub>3</sub>H<sub>7</sub>COOH + 3H<sub>2</sub> → C<sub>4</sub>H<sub>10</sub> + 2H<sub>2</sub>O (S3 + S8 + S9) catalyzed by Ni<sub>12</sub>P<sub>5</sub> cluster.

**Table S1:** Sum of electronic energies ( $E_t$ , hartree), free energies ( $G_0$ , hartree), sum of electronic and free energies ( $G_c$ , hartree), relative energies ( $G_r$ , kJ mol<sup>-1</sup>) and relative energies ( $G_r(\text{CO}_2\uparrow)$ , kJ mol<sup>-1</sup>, under the experimental condition of 10<sup>-5</sup> atm pressure of CO<sub>2</sub>) of various species with respect to the reactants for the reaction of C<sub>3</sub>H<sub>7</sub>COOH → C<sub>3</sub>H<sub>8</sub> + CO<sub>2</sub> catalyzed by Ni<sub>12</sub>P<sub>5</sub> cluster at GGA-PBE/DNP, DSPP level.

| Species                                                                           | $E_t$       | $G_0$    | $G_c$       | $G_r$ | $G_r(\text{CO}_2\uparrow)$ |
|-----------------------------------------------------------------------------------|-------------|----------|-------------|-------|----------------------------|
| C <sub>3</sub> H <sub>7</sub> COOH + Ni <sub>12</sub> P <sub>5</sub>              | -4336.00003 | -0.05954 | -4336.05957 | 0.0   | 0.0                        |
| F2-IM1                                                                            | -4336.02356 | -0.03277 | -4336.05633 | 8.5   | 8.5                        |
| F2-TS1                                                                            | -4335.99038 | -0.03776 | -4336.02814 | 82.5  | 82.5                       |
| F2-IM2                                                                            | -4336.03597 | -0.02437 | -4336.06034 | -2.0  | -2.0                       |
| F2-TS2                                                                            | -4335.96595 | -0.03421 | -4336.00016 | 156.0 | 156.0                      |
| F2-IM3                                                                            | -4336.02470 | -0.04138 | -4336.06608 | -17.1 | -17.1                      |
| F2-IM4                                                                            | -4147.54755 | -0.03086 | -4147.57842 |       |                            |
| F2-IM4 + CO <sub>2</sub>                                                          | -4336.02590 | -0.05836 | -4336.08426 | -64.8 | -113.9                     |
| F2-TS3                                                                            | -4147.52561 | -0.03377 | -4147.55938 |       |                            |
| F2-TS3 + CO <sub>2</sub>                                                          | -4336.00396 | -0.06126 | -4336.06522 | -14.8 | -63.9                      |
| F2-IM5                                                                            | -4147.54142 | -0.02771 | -4147.56913 |       |                            |
| F2-IM5 + CO <sub>2</sub>                                                          | -4336.01977 | -0.05520 | -4336.07497 | -40.4 | -89.6                      |
| Ni <sub>12</sub> P <sub>5</sub>                                                   | -4028.52257 | -0.11260 | -4028.63517 |       |                            |
| Ni <sub>12</sub> P <sub>5</sub> + CO <sub>2</sub> + C <sub>3</sub> H <sub>8</sub> | -4336.00525 | -0.09140 | -4336.09665 | -97.4 | -146.5                     |

**Table S2:** Sum of electronic energies ( $E_t$ , hartree), free energies ( $G_0$ , hartree), sum of electronic and free energies ( $G_c$ , hartree) and relative energies ( $G_r$ , kJ mol<sup>-1</sup>) of various species with respect to the reactants for the reaction of  $C_3H_7COOH + H_2 \rightarrow C_3H_7CHO + H_2O$  catalyzed by  $Ni_{12}P_5$  at GGA-PBE/DNP, DSPP level.

| Species                                      | $E_t$       | $G_0$    | $G_c$       | $G_r$ |
|----------------------------------------------|-------------|----------|-------------|-------|
| $H_2 + Ni_{12}P_5$                           | -4029.68688 | -0.12734 | -4029.81423 | 0.0   |
| F3-IM1                                       | -4029.71450 | -0.10315 | -4029.81765 | -9.0  |
| F3-TS1                                       | -4029.71220 | -0.10121 | -4029.81341 | 2.1   |
| F3-IM2                                       | -4029.73086 | -0.09956 | -4029.83042 | -42.5 |
| F3-IM3                                       | -4337.23107 | -0.00538 | -4337.23645 |       |
| F3-IM3 - $C_3H_7COOH$                        | -4029.75361 | -0.05845 | -4029.81206 | 5.7   |
| F3-TS2                                       | -4337.21041 | -0.00844 | -4337.21885 |       |
| F3-TS2 - $C_3H_7COOH$                        | -4029.73295 | -0.06151 | -4029.79446 | 51.9  |
| F3-IM4                                       | -4337.23771 | -0.02003 | -4337.25774 |       |
| F3-IM4 - $C_3H_7COOH$                        | -4029.76024 | -0.07310 | -4029.83335 | -50.2 |
| F3-IM5                                       | -4337.22910 | -0.01378 | -4337.24288 |       |
| F3-IM5 - $C_3H_7COOH$                        | -4029.75164 | -0.06684 | -4029.81848 | -11.2 |
| F3-TS3                                       | -4337.21262 | -0.01607 | -4337.22869 |       |
| F3-TS3 - $C_3H_7COOH$                        | -4029.73516 | -0.06913 | -4029.80429 | 26.1  |
| F3-IM6                                       | -4337.21767 | -0.01481 | -4337.23247 |       |
| 3-IM6 - $C_3H_7COOH$                         | -4029.74020 | -0.06788 | -4029.80808 | 16.2  |
| F3-IM7                                       | -4104.95550 | -0.09667 | -4105.05217 |       |
| F3-IM7 - $C_3H_7COOH + C_3H_7CHO$            | -4029.73060 | -0.10005 | -4029.83065 | -43.1 |
| 3-TS4                                        | -4104.91349 | -0.10246 | -4105.01595 |       |
| F3-TS4 - $C_3H_7COOH + C_3H_7CHO$            | -4029.68858 | -0.10585 | -4029.79443 | 52.0  |
| 3-IM8                                        | -4104.93598 | -0.09718 | -4105.03316 |       |
| F3-IM8 - $C_3H_7COOH + C_3H_7CHO$            | -4029.71108 | -0.10056 | -4029.81164 | 6.8   |
| $Ni_{12}P_5$                                 | -4028.52257 | -0.11260 | -4028.63517 |       |
| $Ni_{12}P_5 - C_3H_7COOH + C_3H_7CHO + H_2O$ | -4029.68044 | -0.13126 | -4029.81170 | 6.6   |

**Table S3:** Sum of electronic energies ( $E_t$ , hartree), free energies ( $G_0$ , hartree), sum of electronic and free energies ( $G_c$ , hartree), relative energies ( $G_r$ , kJ mol<sup>-1</sup>) and relative energies ( $G_r(\text{CO}\uparrow)$ , kJ mol<sup>-1</sup>), under the experimental condition of 10<sup>-5</sup> atm pressure of CO) of various species with respect to the reactants for the reaction of C<sub>3</sub>H<sub>7</sub>CHO → C<sub>3</sub>H<sub>8</sub> + CO catalyzed by Ni<sub>12</sub>P<sub>5</sub> cluster at GGA-PBE/DNP, DSPP level.

| Species                                                                                                                      | $E_t$        | $G_0$    | $G_c$       | $G_r$ | $G_r(\text{CO}\uparrow)$ |
|------------------------------------------------------------------------------------------------------------------------------|--------------|----------|-------------|-------|--------------------------|
| Ni <sub>12</sub> P <sub>5</sub> - C <sub>3</sub> H <sub>7</sub> COOH + C <sub>3</sub> H <sub>7</sub> CHO + H <sub>2</sub> O  | -4029.68044  | -0.13126 | -4029.81170 | 6.6   | 6.6                      |
| F4-IM1                                                                                                                       | -4260.82409  | -0.02045 | -4260.84454 |       |                          |
| F4-IM1 - C <sub>3</sub> H <sub>7</sub> COOH + H <sub>2</sub> O                                                               | -4029.729406 | -0.08878 | -4029.81819 | -10.4 | -10.4                    |
| F4-ITS1                                                                                                                      | -4260.79641  | -0.02784 | -4260.82425 |       |                          |
| F4-TS1 - C <sub>3</sub> H <sub>7</sub> COOH + H <sub>2</sub> O                                                               | -4029.70172  | -0.09618 | -4029.79790 | 42.9  | 42.9                     |
| F4-IM2                                                                                                                       | -4260.83218  | -0.02638 | -4260.85856 |       |                          |
| F4-IM2 - C <sub>3</sub> H <sub>7</sub> COOH + H <sub>2</sub> O                                                               | -4029.73750  | -0.09471 | -4029.83221 | -47.2 | -47.2                    |
| F4-TS2                                                                                                                       | -4260.81529  | -0.03433 | -4260.84962 |       |                          |
| F4-TS2 - C <sub>3</sub> H <sub>7</sub> COOH + H <sub>2</sub> O                                                               | -4029.72060  | -0.10266 | -4029.82327 | -23.7 | -23.7                    |
| F4-IM3                                                                                                                       | -4260.83511  | -0.03682 | -4260.87193 |       |                          |
| F4-IM3 - C <sub>3</sub> H <sub>7</sub> COOH + H <sub>2</sub> O                                                               | -4029.74043  | -0.10515 | -4029.84558 | -82.3 | -82.3                    |
| F4-IM4                                                                                                                       | -4147.54424  | -0.03472 | -4147.57897 |       |                          |
| F4-IM4 - C <sub>3</sub> H <sub>7</sub> COOH + H <sub>2</sub> O + CO                                                          | -4029.68112  | -0.13530 | -4029.81642 | -5.8  | -54.9                    |
| F4-TS3                                                                                                                       | -4147.52727  | -0.03326 | -4147.56053 |       |                          |
| F4-TS3 - C <sub>3</sub> H <sub>7</sub> COOH + H <sub>2</sub> O + CO                                                          | -4029.66414  | -0.13384 | -4029.79798 | 42.7  | -6.4                     |
| F4-IM5                                                                                                                       | -4147.53590  | -0.03040 | -4147.56630 |       |                          |
| F4-IM5 - C <sub>3</sub> H <sub>7</sub> COOH + H <sub>2</sub> O + CO                                                          | -4029.67278  | -0.13098 | -4029.80376 | 27.5  | -21.6                    |
| Ni <sub>12</sub> P <sub>5</sub>                                                                                              | -4028.52257  | -0.11260 | -4028.63517 |       |                          |
| Ni <sub>12</sub> P <sub>5</sub> - C <sub>3</sub> H <sub>7</sub> COOH + H <sub>2</sub> O + CO + C <sub>3</sub> H <sub>8</sub> | -4029.66377  | -0.16449 | -4029.82826 | -36.8 | -85.9                    |

**Table S4:** Sum of electronic energies ( $E_t$ , hartree), free energies ( $G_0$ , hartree), sum of electronic and free energies ( $G_c$ , hartree), relative energies ( $G_r$ , kJ mol<sup>-1</sup>) and relative energies ( $G_r(\text{CO}\uparrow)$ , kJ mol<sup>-1</sup>), under the experimental condition of 10<sup>-5</sup> atm pressure of CO) of various species with respect to the reactants for the reaction of C<sub>3</sub>H<sub>7</sub>COOH → C<sub>2</sub>H<sub>5</sub>CH<sub>2</sub>OH + CO catalyzed by Ni<sub>12</sub>P<sub>5</sub> cluster at GGA-PBE/DNP, DSPP level.

| Species                                                                                 | $E_t$       | $G_0$    | $G_c$       | $G_r$ | $G_r(\text{CO}\uparrow)$ |
|-----------------------------------------------------------------------------------------|-------------|----------|-------------|-------|--------------------------|
| C <sub>3</sub> H <sub>7</sub> COOH + Ni <sub>12</sub> P <sub>5</sub>                    | -4336.00003 | -0.05954 | -4336.05957 | 0.0   | 0.0                      |
| F5-IM1                                                                                  | -4336.02356 | -0.03277 | -4336.05633 | 8.5   | 8.5                      |
| F5-TS1                                                                                  | -4335.98031 | -0.02971 | -4336.01002 | 130.1 | 130.1                    |
| F5-IM2                                                                                  | -4336.03381 | -0.02430 | -4336.05811 | 3.8   | 3.8                      |
| F5-IM3                                                                                  | -4336.04538 | -0.01939 | -4336.06477 | -13.6 | -13.6                    |
| F5-TS2                                                                                  | -4336.00541 | -0.03395 | -4336.03935 | 53.1  | 53.1                     |
| F5-IM4                                                                                  | -4336.05753 | -0.02749 | -4336.08503 | -66.8 | -66.8                    |
| F5-IM5                                                                                  | -4222.74875 | -0.03151 | -4222.78026 |       |                          |
| F5-IM5+ CO                                                                              | -4335.98031 | -0.06375 | -4336.04407 | 40.7  | -8.4                     |
| F5-TS3                                                                                  | -4222.69690 | -0.03049 | -4222.72740 |       |                          |
| F5-TS3 + CO                                                                             | -4335.92846 | -0.06274 | -4335.99120 | 179.5 | 130.4                    |
| F5-IM6                                                                                  | -4222.73881 | -0.02243 | -4222.76124 |       |                          |
| F5-IM6 + CO                                                                             | -4335.97037 | -0.05467 | -4336.02505 | 90.6  | 41.5                     |
| Ni <sub>12</sub> P <sub>5</sub>                                                         | -4028.52257 | -0.11260 | -4028.63517 |       |                          |
| Ni <sub>12</sub> P <sub>5</sub> + CO + C <sub>2</sub> H <sub>5</sub> HC <sub>2</sub> OH | -4335.93724 | -0.09721 | -4336.03445 | 66.0  | 16.9                     |

**Table S5:** Sum of electronic energies ( $E_t$ , hartree), free energies ( $G_0$ , hartree), sum of electronic and free energies ( $G_c$ , hartree), relative energies ( $G_r$ , kJ mol<sup>-1</sup>) and relative energies ( $G_r(\text{CO}\uparrow)$ , kJ mol<sup>-1</sup>), under the experimental condition of 10<sup>-5</sup> atm pressure of CO) of various species with respect to the reactants for the reaction of C<sub>2</sub>H<sub>5</sub>CH<sub>2</sub>OH + H<sub>2</sub> → C<sub>3</sub>H<sub>8</sub> + H<sub>2</sub>O catalyzed by Ni<sub>12</sub>P<sub>5</sub> cluster at GGA-PBE/DNP, DSPP level.

| Species                                                                                                  | $E_t$       | $G_0$    | $G_c$       | $G_r$ | $G_r(\text{CO}\uparrow)$ |
|----------------------------------------------------------------------------------------------------------|-------------|----------|-------------|-------|--------------------------|
| Ni <sub>12</sub> P <sub>5</sub> + CO + C <sub>2</sub> H <sub>5</sub> CH <sub>2</sub> OH                  | -4335.93724 | -0.09721 | -4336.03445 | 66.0  | 16.9                     |
| F6-IM1                                                                                                   | -4029.71450 | -0.10315 | -4029.81765 |       |                          |
| F6-IM1 + CO + C <sub>2</sub> H <sub>5</sub> CH <sub>2</sub> OH - H <sub>2</sub>                          | -4335.96486 | -0.07301 | -4336.03787 | 57.0  | 7.9                      |
| F6-TS1                                                                                                   | -4029.71220 | -0.10121 | -4029.81341 |       |                          |
| F6-TS1 + CO + C <sub>2</sub> H <sub>5</sub> CH <sub>2</sub> OH - H <sub>2</sub>                          | -4335.96255 | -0.07108 | -4336.03363 | 68.1  | 19.0                     |
| F6-IM2                                                                                                   | -4029.73086 | -0.09956 | -4029.83042 |       |                          |
| F6-IM2 + CO + C <sub>2</sub> H <sub>5</sub> CH <sub>2</sub> OH - H <sub>2</sub>                          | -4335.98121 | -0.06943 | -4336.05064 | 23.5  | -25.7                    |
| F6-IM3                                                                                                   | -4223.94962 | -0.01151 | -4223.96113 |       |                          |
| F6-IM3 + CO - H <sub>2</sub>                                                                             | -4336.01687 | -0.02901 | -4336.04588 | 35.9  | -13.2                    |
| F6-TS2                                                                                                   | -4223.90600 | -0.01588 | -4223.92188 |       |                          |
| F6-TS2 + CO - H <sub>2</sub>                                                                             | -4335.97325 | -0.03339 | -4336.00664 | 139.0 | 89.9                     |
| F6-IM4                                                                                                   | -4223.95841 | -0.01804 | -4223.97644 |       |                          |
| F6-IM4 + CO - H <sub>2</sub>                                                                             | -4336.02566 | -0.03554 | -4336.06120 | -4.3  | -53.4                    |
| F6-TS3                                                                                                   | -4223.90811 | -0.02192 | -4223.93003 |       |                          |
| F6-TS3 + CO - H <sub>2</sub>                                                                             | -4335.97536 | -0.03942 | -4336.01478 | 117.6 | 68.5                     |
| F6-IM5                                                                                                   | -4223.95305 | -0.01400 | -4223.96705 |       |                          |
| F6-IM5 + CO - H <sub>2</sub>                                                                             | -4336.02030 | -0.03150 | -4336.05180 | 20.4  | -28.7                    |
| F6-IM6                                                                                                   | -4147.54432 | -0.03517 | -4147.57949 |       |                          |
| F6-IM6 + CO - H <sub>2</sub> + H <sub>2</sub> O                                                          | -4335.99435 | -0.06794 | -4336.06229 | -7.1  | -56.2                    |
| F6-TS4                                                                                                   | -4147.52768 | -0.03657 | -4147.56425 |       |                          |
| F6-TS4 + CO - H <sub>2</sub> + H <sub>2</sub> O                                                          | -4335.97771 | -0.06934 | -4336.04705 | 32.9  | -16.2                    |
| F6-IM7                                                                                                   | -4147.53751 | -0.03431 | -4147.57183 |       |                          |
| F6-IM7 + CO - H <sub>2</sub> + H <sub>2</sub> O                                                          | -4335.98755 | -0.06708 | -4336.05463 | 13.0  | -36.1                    |
| Ni <sub>12</sub> P <sub>5</sub>                                                                          | -4028.52257 | -0.11260 | -4028.63517 |       |                          |
| Ni <sub>12</sub> P <sub>5</sub> + CO - H <sub>2</sub> + C <sub>3</sub> H <sub>8</sub> + H <sub>2</sub> O | -4335.97693 | -0.09668 | -4336.07361 | -36.9 | -86.0                    |

**Table S6:** Sum of electronic energies ( $E_t$ , hartree), free energies ( $G_0$ , hartree), sum of electronic and free energies ( $G_c$ , hartree), relative energies ( $G_r$ , kJ mol<sup>-1</sup>) and relative energies ( $G_r(\text{CO}\uparrow)$ , kJ mol<sup>-1</sup>), under the experimental condition of 10<sup>-5</sup> atm pressure of CO) of various species with respect to the reactants for the reaction of C<sub>2</sub>H<sub>5</sub>CH<sub>2</sub>OH → CH<sub>3</sub>CH=CH<sub>2</sub> + H<sub>2</sub>O catalyzed by Ni<sub>12</sub>P<sub>5</sub> cluster at GGA-PBE/DNP, DSPP level.

| Species                                                                                      | $E_t$       | $G_0$    | $G_c$       | $G_r$ | $G_r(\text{CO}\uparrow)$ |
|----------------------------------------------------------------------------------------------|-------------|----------|-------------|-------|--------------------------|
| Ni <sub>12</sub> P <sub>5</sub> + CO + C <sub>2</sub> H <sub>5</sub> CH <sub>2</sub> OH      | -4335.93724 | -0.09721 | -4336.03445 | 66.0  | 16.9                     |
| F7-IM1                                                                                       | -4222.73881 | -0.02243 | -4222.76124 |       |                          |
| F7-IM1 + CO                                                                                  | -4335.97037 | -0.05467 | -4336.02505 | 90.6  | 41.5                     |
| F7-TS1                                                                                       | -4222.69682 | -0.03049 | -4222.72731 |       |                          |
| F7-TS1 + CO                                                                                  | -4335.92838 | -0.06274 | -4335.99111 | 179.7 | 130.6                    |
| F7-IM2                                                                                       | -4222.74875 | -0.03151 | -4222.78026 |       |                          |
| F7-IM2 + CO                                                                                  | -4335.98031 | -0.06375 | -4336.04407 | 40.7  | -8.4                     |
| F7-TS2                                                                                       | -4222.69632 | -0.03881 | -4222.73513 |       |                          |
| F7-TS2 + CO                                                                                  | -4335.92788 | -0.07106 | -4335.99893 | 159.2 | 110.1                    |
| F7-IM3                                                                                       | -4222.72951 | -0.02883 | -4222.75834 |       |                          |
| F7-IM3 + CO                                                                                  | -4335.96107 | -0.06107 | -4336.02215 | 98.3  | 49.2                     |
| F7-IM4                                                                                       | -4146.33129 | -0.04709 | -4146.37838 |       |                          |
| F7-IM4 + CO + H <sub>2</sub> O                                                               | -4335.94563 | -0.09460 | -4336.04023 | 50.8  | 1.7                      |
| F7-TS3                                                                                       | -4146.29242 | -0.04955 | -4146.34197 |       |                          |
| F7-TS3 + CO + H <sub>2</sub> O                                                               | -4335.90676 | -0.09706 | -4336.00383 | 146.4 | 97.2                     |
| F7-IM5                                                                                       | -4146.35640 | -0.04777 | -4146.40417 |       |                          |
| F7-IM5 + CO + H <sub>2</sub> O                                                               | -4335.97074 | -0.09528 | -4336.06602 | -16.9 | -66.0                    |
| Ni <sub>12</sub> P <sub>5</sub>                                                              | -4028.52257 | -0.11260 | -4028.63517 |       |                          |
| Ni <sub>12</sub> P <sub>5</sub> + CO + H <sub>2</sub> O + CH <sub>3</sub> CH=CH <sub>2</sub> | -4335.91504 | -0.13324 | -4336.04828 | 29.6  | -19.5                    |

**Table S7:** Sum of electronic energies ( $E_t$ , hartree), free energies ( $G_0$ , hartree), sum of electronic and free energies ( $G_c$ , hartree), relative energies ( $G_r$ , kJ mol<sup>-1</sup>) and relative energies ( $G_r(\text{CO}\uparrow)$ , kJ mol<sup>-1</sup>, under the experimental condition of 10<sup>-5</sup> atm pressure of CO) of various species with respect to the reactants for the reaction of CH<sub>3</sub>CH=CH<sub>2</sub> + H<sub>2</sub> → C<sub>3</sub>H<sub>8</sub> catalyzed by Ni<sub>12</sub>P<sub>5</sub> cluster at GGA-PBE/DNP, DSPP level.

| Species                                                                                                  | $E_t$       | $G_0$    | $G_c$       | $G_r$ | $G_r(\text{CO}\uparrow)$ |
|----------------------------------------------------------------------------------------------------------|-------------|----------|-------------|-------|--------------------------|
| Ni <sub>12</sub> P <sub>5</sub> + CO + H <sub>2</sub> O + CH <sub>3</sub> CH=CH <sub>2</sub>             | -4335.91504 | -0.13324 | -4336.04828 | 29.6  | -19.5                    |
| F3-IM1                                                                                                   | -4029.71450 | -0.10315 | -4029.81765 |       |                          |
| F3-IM1 + CO + H <sub>2</sub> O + CH <sub>3</sub> CH=CH <sub>2</sub> - H <sub>2</sub>                     | -4335.94266 | -0.10905 | -4336.05171 | 20.6  | -28.5                    |
| F3-TS1                                                                                                   | -4029.71220 | -0.10121 | -4029.81341 |       |                          |
| F3-TS1 + CO + H <sub>2</sub> O + CH <sub>3</sub> CH=CH <sub>2</sub> - H <sub>2</sub>                     | -4335.94035 | -0.10711 | -4336.04747 | 31.8  | -17.3                    |
| F3-IM2                                                                                                   | -4029.73086 | -0.09956 | -4029.83042 |       |                          |
| F3-IM2 + CO + H <sub>2</sub> O + CH <sub>3</sub> CH=CH <sub>2</sub> - H <sub>2</sub>                     | -4335.95901 | -0.10546 | -4336.06447 | -12.9 | -62.0                    |
| F7-IM6                                                                                                   | -4147.55887 | -0.03395 | -4147.59281 |       |                          |
| F7-IM6 + CO + H <sub>2</sub> O - H <sub>2</sub>                                                          | -4336.00890 | -0.06672 | -4336.07562 | -42.1 | -91.2                    |
| F7-TS4                                                                                                   | -4147.53352 | -0.03684 | -4147.57035 |       |                          |
| F7-TS4 + CO + H <sub>2</sub> O - H <sub>2</sub>                                                          | -4335.98355 | -0.06961 | -4336.05315 | 16.8  | -32.3                    |
| F7-IM7                                                                                                   | -4147.54681 | -0.03149 | -4147.57830 |       |                          |
| F7-IM7 + CO + H <sub>2</sub> O - H <sub>2</sub>                                                          | -4335.99684 | -0.06426 | -4336.06110 | -4.0  | -53.1                    |
| F7-TS5                                                                                                   | -4147.52812 | -0.03627 | -4147.56438 |       |                          |
| F7-TS5 + CO + H <sub>2</sub> O - H <sub>2</sub>                                                          | -4335.97815 | -0.06904 | -4336.04719 | 32.5  | -16.6                    |
| F7-IM8                                                                                                   | -4147.54279 | -0.03035 | -4147.57313 |       |                          |
| F7-IM8 + CO + H <sub>2</sub> O - H <sub>2</sub>                                                          | -4335.99282 | -0.06312 | -4336.05594 | 9.5   | -39.6                    |
| Ni <sub>12</sub> P <sub>5</sub>                                                                          | -4028.52257 | -0.11260 | -4028.63517 |       |                          |
| Ni <sub>12</sub> P <sub>5</sub> + CO + H <sub>2</sub> O - H <sub>2</sub> + C <sub>3</sub> H <sub>8</sub> | -4335.97693 | -0.09668 | -4336.07361 | -36.9 | -86.0                    |

**Table S8:** Sum of electronic energies ( $E_t$ , hartree), free energies ( $G_0$ , hartree), sum of electronic and free energies ( $G_c$ , hartree) and relative energies ( $G_r$ , kJ mol<sup>-1</sup>) of various species with respect to the reactants for the reaction of  $C_3H_7CHO + H_2 \rightarrow C_3H_7CH_2OH$  catalyzed by  $Ni_{12}P_5$  cluster at GGA-PBE/DNP, DSPP level.

| Species                                               | $E_t$       | $G_0$    | $G_c$       | $G_r$ |
|-------------------------------------------------------|-------------|----------|-------------|-------|
| $Ni_{12}P_5 - C_3H_7COOH + C_3H_7CHO + H_2O$          | -4029.68044 | -0.13126 | -4029.81170 | 6.6   |
| F3-IM1                                                | -4029.71450 | -0.10315 | -4029.81765 |       |
| F3-IM1 - $C_3H_7COOH + C_3H_7CHO + H_2O - H_2$        | -4029.70807 | -0.10706 | -4029.81513 | -2.4  |
| F3-TS1                                                | -4029.71220 | -0.10121 | -4029.81341 |       |
| F3-TS1 - $C_3H_7COOH + C_3H_7CHO + H_2O - H_2$        | -4029.70576 | -0.10513 | -4029.81089 | 8.8   |
| F3-IM2                                                | -4029.73086 | -0.09956 | -4029.83042 |       |
| F3-IM2 - $C_3H_7COOH + C_3H_7CHO + H_2O - H_2$        | -4029.72442 | -0.10347 | -4029.82789 | -35.9 |
| F8-IM3                                                | -4262.02168 | -0.01326 | -4262.03494 |       |
| F8-IM3 + $H_2O - C_3H_7COOH - H_2$                    | -4029.76269 | -0.06685 | -4029.82954 | -40.2 |
| F8-TS2                                                | -4261.99075 | -0.01603 | -4262.00678 |       |
| F8-TS2 + $H_2O - C_3H_7COOH - H_2$                    | -4029.73176 | -0.06962 | -4029.80138 | 33.7  |
| F8-IM4                                                | -4262.01172 | -0.00328 | -4262.01499 |       |
| F8-IM4 + $H_2O - C_3H_7COOH - H_2$                    | -4029.75272 | -0.05687 | -4029.80959 | 12.2  |
| F8-TS3                                                | -4261.97891 | -0.00838 | -4261.98729 |       |
| F8-TS3 + $H_2O - C_3H_7COOH - H_2$                    | -4029.71991 | -0.06198 | -4029.78189 | 84.9  |
| F8-IM5                                                | -4261.99110 | -0.00016 | -4261.99126 |       |
| F8-IM5 + $H_2O - C_3H_7COOH - H_2$                    | -4029.73211 | -0.05375 | -4029.78586 | 74.5  |
| $Ni_{12}P_5$                                          | -4028.52257 | -0.11260 | -4028.63517 |       |
| $Ni_{12}P_5 + H_2O - C_3H_7COOH - H_2 + C_3H_7CH_2OH$ | -4029.71747 | -0.09568 | -4029.81315 | 2.8   |

**Table S9:** Sum of electronic energies ( $E_t$ , hartree), free energies ( $G_0$ , hartree), sum of electronic and free energies ( $G_c$ , hartree) and relative energies ( $G_r$ , kJ mol<sup>-1</sup>) of various species with respect to the reactants for the reaction of  $C_3H_7CH_2OH + H_2 \rightarrow C_4H_{10} + H_2O$  catalyzed by  $Ni_{12}P_5$  cluster at GGA-PBE/DNP, DSPP level.

| Species                                               | $E_t$       | $G_0$    | $G_c$       | $G_r$  |
|-------------------------------------------------------|-------------|----------|-------------|--------|
| $Ni_{12}P_5 + H_2O - C_3H_7COOH - H_2 + C_3H_7CH_2OH$ | -4029.71747 | -0.09568 | -4029.81315 | 2.8    |
| F3-IM1                                                | -4029.71450 | -0.10315 | -4029.81765 |        |
| $F3-IM1 + H_2O - C_3H_7COOH - 2H_2 + C_3H_7CH_2OH$    | -4029.74509 | -0.07148 | -4029.81657 | -6.2   |
| F3-TS1                                                | -4029.71220 | -0.10121 | -4029.81341 |        |
| $F3-TS1 + H_2O - C_3H_7COOH - 2H_2 + C_3H_7CH_2OH$    | -4029.74278 | -0.06955 | -4029.81233 | 5.0    |
| F3-IM2                                                | -4029.73086 | -0.09956 | -4029.83042 |        |
| $F3-IM2 + H_2O - C_3H_7COOH - 2H_2 + C_3H_7CH_2OH$    | -4029.76144 | -0.06789 | -4029.82934 | -39.7  |
| F9-IM3                                                | -4263.22161 | 0.00937  | -4263.21224 |        |
| $F9-IM3 + H_2O - C_3H_7COOH - 2H_2$                   | -4029.79830 | -0.02948 | -4029.82779 | -35.6  |
| F9-TS2                                                | -4263.17838 | 0.01002  | -4263.16837 |        |
| $F9-TS2 + H_2O - C_3H_7COOH - 2H_2$                   | -4029.75508 | -0.02884 | -4029.78391 | 79.6   |
| F9-IM4                                                | -4263.23383 | 0.00835  | -4263.22548 |        |
| $F9-IM4 + H_2O - C_3H_7COOH - 2H_2$                   | -4029.81052 | -0.03050 | -4029.84102 | -70.3  |
| F9-TS3                                                | -4263.17957 | -0.00299 | -4263.18257 |        |
| $F9-TS3 + H_2O - C_3H_7COOH - 2H_2$                   | -4029.75627 | -0.04185 | -4029.79811 | 42.3   |
| F9-IM5                                                | -4263.22532 | 0.00811  | -4263.21721 |        |
| $F9-IM5 + H_2O - C_3H_7COOH - 2H_2$                   | -4029.80202 | -0.03074 | -4029.83276 | -48.6  |
| F9-IM6                                                | -4186.81653 | -0.00572 | -4186.82225 |        |
| $F9-IM6 + 2H_2O - C_3H_7COOH - 2H_2$                  | -4029.77601 | -0.05983 | -4029.83584 | -56.7  |
| F9-TS4                                                | -4186.86917 | -0.01187 | -4186.88104 |        |
| $F9-TS4 + 2H_2O - C_3H_7COOH - 2H_2$                  | -4029.82864 | 0.02018  | -4029.80847 | 15.1   |
| F9-IM7                                                | -4186.80856 | 0.00396  | -4186.80460 |        |
| $F9-IM7 + 2H_2O - C_3H_7COOH - 2H_2$                  | -4029.76804 | -0.05016 | -4029.81820 | -10.4  |
| $Ni_{12}P_6$                                          | -4028.52257 | -0.11260 | -4028.63517 |        |
| $Ni_{12}P_5 + 2H_2O - C_3H_7COOH - 2H_2 + C_4H_{10}$  | -4029.75742 | -0.09582 | -4029.85324 | -102.4 |

**Table S10:** Sum of electronic energies ( $E_t$ , hartree), free energies ( $G_0$ , hartree), sum of electronic and free energies ( $G_c$ , hartree) and relative energies ( $G_r$ , kJ mol<sup>-1</sup>) of various species with respect to the reactants for the reaction of  $C_3H_7CH_2OH \rightarrow CH_3CH_2CH=CH_2 + H_2O$  catalyzed over  $Ni_{12}P_5$  cluster at GGA-PBE/DNP, DSPP level.

| Species                                                   | $E_t$       | $G_0$    | $G_c$       | $G_r$ |
|-----------------------------------------------------------|-------------|----------|-------------|-------|
| $Ni_{12}P_5 + H_2O - C_3H_7COOH - H_2 + C_3H_7CH_2OH$     | -4029.71747 | -0.09568 | -4029.81315 | 2.8   |
| F10-IM1                                                   | -4262.01293 | -0.00466 | -4262.01758 |       |
| F10-IM1+ $H_2O - C_3H_7COOH - H_2$                        | -4029.75393 | -0.05825 | -4029.81218 | 5.4   |
| F10-TS1                                                   | -4261.97090 | -0.00720 | -4261.97810 |       |
| F10-TS1+ $H_2O - C_3H_7COOH - H_2$                        | -4029.71190 | -0.06080 | -4029.77270 | 109.0 |
| F10-IM2                                                   | -4262.02099 | -0.00803 | -4262.02902 |       |
| F10-IM2+ $H_2O - C_3H_7COOH - H_2$                        | -4029.76200 | -0.06162 | -4029.82362 | -24.7 |
| F10-TS2                                                   | -4261.97062 | -0.01553 | -4261.98615 |       |
| F10-TS2+ $H_2O - C_3H_7COOH - H_2$                        | -4029.71163 | -0.06912 | -4029.78075 | 87.9  |
| F10-IM3                                                   | -4262.00179 | -0.01170 | -4262.01349 |       |
| F10-IM3+ $H_2O - C_3H_7COOH - H_2$                        | -4029.74280 | -0.06529 | -4029.80809 | 16.1  |
| F10-IM4                                                   | -4185.60329 | -0.02465 | -4185.62794 |       |
| F10-IM4 - $C_3H_7COOH - H_2 + 2H_2O$                      | -4029.72708 | -0.09351 | -4029.82059 | -16.7 |
| F10-TS3                                                   | -4185.56470 | -0.02943 | -4185.59413 |       |
| F10-TS3 - $C_3H_7COOH - H_2 + 2H_2O$                      | -4029.68848 | -0.09829 | -4029.78677 | 72.1  |
| F10-IM4                                                   | -4185.62859 | -0.02733 | -4185.65592 |       |
| F10-IM4 - $C_3H_7COOH - H_2 + 2H_2O$                      | -4029.75237 | -0.09619 | -4029.84857 | -90.1 |
| $Ni_{12}P_5$                                              | -4028.52257 | -0.11260 | -4028.63517 |       |
| $Ni_{12}P_5 - C_3H_7COOH - H_2 + 2H_2O + CH_3CH_2CH=CH_2$ | -4029.69500 | -0.13166 | -4029.82666 | -32.6 |

**Table S11:** Sum of electronic energies ( $E_t$ , hartree), free energies ( $G_0$ , hartree), sum of electronic and free energies ( $G_c$ , hartree) and relative energies ( $G_r$ , kJ mol<sup>-1</sup>) of various species with respect to the reactants for the reaction of  $\text{CH}_3\text{CH}_2\text{CH}=\text{CH}_2 + \text{H}_2 \rightarrow \text{C}_4\text{H}_{10}$  catalyzed by  $\text{Ni}_{12}\text{P}_5$  cluster at GGA-PBE/DNP, DSPP level.

| Species                                                                                                                                       | $E_t$        | $G_0$    | $G_c$       | $G_r$  |
|-----------------------------------------------------------------------------------------------------------------------------------------------|--------------|----------|-------------|--------|
| $\text{Ni}_{12}\text{P}_5 + 2\text{H}_2\text{O} - \text{C}_3\text{H}_7\text{COOH} - \text{H}_2 + \text{CH}_3\text{CH}_2\text{CH}=\text{CH}_2$ | -4029.69500  | -0.13166 | -4029.82666 | -32.6  |
| F3-IM1                                                                                                                                        | -4029.71450  | -0.10315 | -4029.81765 |        |
| $\text{F3-IM1} + 2\text{H}_2\text{O} - \text{C}_3\text{H}_7\text{COOH} - 2\text{H}_2 + \text{CH}_3\text{CH}_2\text{CH}=\text{CH}_2$           | -4029.72262  | -0.10747 | -4029.83009 | -41.6  |
| F3-TS1                                                                                                                                        | -4029.71220  | -0.10121 | -4029.81341 |        |
| $\text{F3-TS1} + 2\text{H}_2\text{O} - \text{C}_3\text{H}_7\text{COOH} - 2\text{H}_2 + \text{CH}_3\text{CH}_2\text{CH}=\text{CH}_2$           | -4029.72032  | -0.10553 | -4029.82585 | -30.5  |
| F3-IM2                                                                                                                                        | -4029.73086  | -0.09956 | -4029.83042 |        |
| $\text{F3-IM2} + 2\text{H}_2\text{O} - \text{C}_3\text{H}_7\text{COOH} - 2\text{H}_2 + \text{CH}_3\text{CH}_2\text{CH}=\text{CH}_2$           | -4029.73898  | -0.10388 | -4029.84285 | -75.2  |
| F10-IM6                                                                                                                                       | -4186.827522 | -0.01624 | -4186.84376 |        |
| $\text{F10-IM6} + 2\text{H}_2\text{O} - \text{C}_3\text{H}_7\text{COOH} - 2\text{H}_2$                                                        | -4029.78700  | -0.07036 | -4029.85735 | -113.2 |
| F10-TS4                                                                                                                                       | -4186.798328 | -0.01376 | -4186.81209 |        |
| $\text{F10-TS4} + 2\text{H}_2\text{O} - \text{C}_3\text{H}_7\text{COOH} - 2\text{H}_2$                                                        | -4029.75780  | -0.06788 | -4029.82569 | -30.1  |
| F10-IM8                                                                                                                                       | -4186.817812 | -0.00985 | -4186.82766 |        |
| $\text{F10-IM7} + 2\text{H}_2\text{O} - \text{C}_3\text{H}_7\text{COOH} - 2\text{H}_2$                                                        | -4029.77729  | -0.06397 | -4029.84125 | -70.9  |
| F10-TS5                                                                                                                                       | -4186.789665 | -0.01258 | -4186.80225 |        |
| $\text{F10-TS5} + 2\text{H}_2\text{O} - \text{C}_3\text{H}_7\text{COOH} - 2\text{H}_2$                                                        | -4029.74914  | -0.06670 | -4029.81584 | -4.2   |
| F10-IM9                                                                                                                                       | -4186.810419 | -0.00408 | -4186.81450 |        |
| $\text{F10-IM9} + 2\text{H}_2\text{O} - \text{C}_3\text{H}_7\text{COOH} - 2\text{H}_2$                                                        | -4029.76989  | -0.05820 | -4029.82810 | -36.4  |
| $\text{Ni}_{12}\text{P}_5$                                                                                                                    | -4028.52257  | -0.11260 | -4028.63517 |        |
| $\text{Ni}_{12}\text{P}_5 + 2\text{H}_2\text{O} - \text{C}_3\text{H}_7\text{COOH} - 2\text{H}_2 + \text{C}_4\text{H}_{10}$                    | -4029.75742  | -0.09582 | -4029.85324 | -102.4 |
